# Supplementary material
Source: PubMed Central journal article supplement (PMC5142444)
Supplement: NIHMS831448-supplement-Supplementary_Figures_1-8_and_Supplementary_Tables_1-6.pdf [file NIHMS831448-supplement-Supplementary_Figures_1-8_and_Supplementary_Tables_1-6.pdf]

## Supplementary Figures

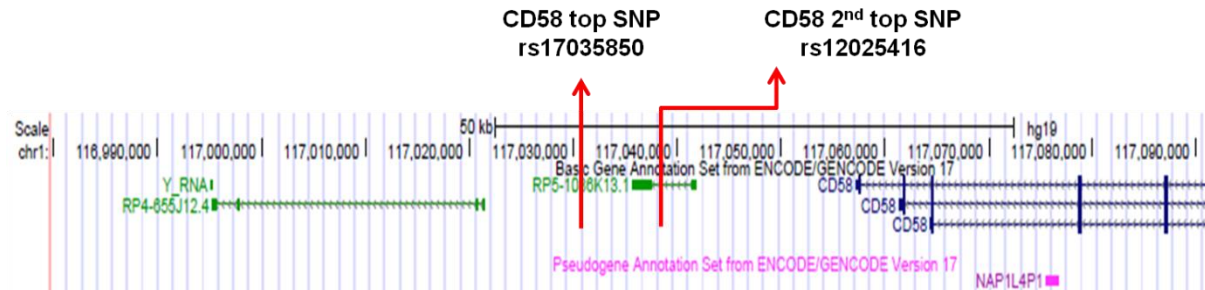

**Supplementary Fig. 1.** Location of top two candidemia associated SNPs in *CD58* gene locus. The region encompass *CD58* and three long non-coding RNAs (RP4-655J12.4, RP5-1086K13.1 and NAP1L4P1). The top SNP rs17035850 is located in intergenic region 25kb 3' of *CD58* gene. The second SNP rs12025416 is located within intron of long non-coding RNA RP5-1086K13.1. The plot generated using UCSC genome browser, hg19 assembly (<http://genome.ucsc.edu>).

## Supplementary Fig. 2

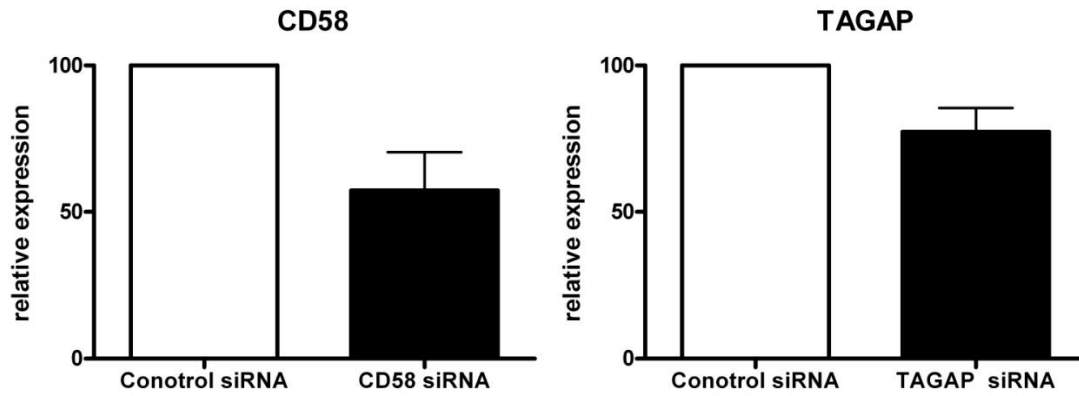

**Supplementary Fig. 2.** Human monocyte-derived macrophages were transfected with control, CD58, and TAGAP siRNA, respectively, for 48 hours. Total mRNA was collected for cDNA synthesis. Relative gene expression was determine by RT-PCR. The experiments were repeated for 4 different individuals. The error bars depicts SEM.

| A. 6 hour data |             |       |           | B. 24 hour data |             |       |            |       |
|----------------|-------------|-------|-----------|-----------------|-------------|-------|------------|-------|
|                | Up          | Up    | Down      |                 | Up          | Down  |            |       |
|                | IFIT1       | 2.111 | SETDB2    | 1.260           | HSPA1A      | 2.087 |            |       |
|                | OAS1        | 1.758 | RGS2      | 1.276           | CD58_2      | 1.908 |            |       |
|                | IFITM1      | 1.695 | SDF2      | 1.272           | HSP61       | 1.908 |            |       |
|                | IFI6        | 1.597 | IL6       | 1.270           | CD58        | 1.881 |            |       |
|                | HIST1H2BD   | 1.572 | HIST2H2AC | 1.270           | HSPA1B      | 1.778 |            |       |
|                | LY6E        | 1.564 | MAP1LC3A  | 1.270           | SERPINB2    | 1.771 |            |       |
|                | ARL4A       | 1.502 | TMEM43    | 1.269           | CDAN1       | 1.638 |            |       |
|                | IFIT3       | 1.495 | CCDC115   | 1.268           | CCL2        | 1.637 |            |       |
|                | CCL5        | 1.490 | FAM63A    | 1.268           | ABHD12      | 1.485 |            |       |
|                | CES1        | 1.481 | HIST2H2BE | 1.267           | PNPT1       | 1.475 |            |       |
|                | VNN2        | 1.474 | MYL12A    | 1.267           | FLJ43681    | 1.419 |            |       |
|                | HLA-A29.1   | 1.470 | DUSP10    | 1.264           | SERPINS2_2  | 1.408 |            |       |
|                | IFI6_2      | 1.470 | IFI35     | 1.262           | ARL2        | 1.406 |            |       |
|                | ADA         | 1.460 | CD72      | 1.262           | TNFAIP3     | 1.401 |            |       |
|                | HIST1H2AC   | 1.446 | UNC93B1   | 1.262           | SOC33       | 1.392 |            |       |
|                | NCF1        | 1.442 | OGFRL1    | 1.261           | CCL4L2      | 1.391 |            |       |
|                | PTGES       | 1.418 | CXCR4     | 1.261           | ARL16       | 1.374 |            |       |
|                | H1FO        | 1.416 | SERPING1  | 1.260           | CXCL5       | 1.373 |            |       |
|                | OAS1_2      | 1.407 | CT1ORF48  | 1.260           | ZC3H12A     | 1.372 |            |       |
|                | MX1         | 1.399 | OAS3      | 1.259           | SRMS5       | 1.370 |            |       |
|                | IFITM2      | 1.398 | LY9       | 1.257           | IRG1        | 1.368 |            |       |
|                | C15         | 1.396 | OAS2      | 1.257           | LEP         | 1.365 |            |       |
|                | HIST1H2BD_2 | 1.392 | STAT1     | 1.257           | NABP2       | 1.364 |            |       |
|                | YFEL1       | 1.390 | RHBD02    | 1.256           | IGSF6       | 1.359 |            |       |
|                | BRSK1       | 1.386 | PLA2G7    | 1.256           | PRKAR1A     | 1.353 |            |       |
|                | NT5C3       | 1.385 | DHRS9     | 1.254           | DEI         | 1.343 |            |       |
|                | GADD45G     | 1.384 | GEP2      | 1.254           | ZNF486      | 1.343 |            |       |
|                | HIST2H2AA3  | 1.383 | NCK1      | 1.254           | RPS6P1      | 1.342 |            |       |
|                | ANG         | 1.382 | ACTA2     | 1.254           | NFKBIZ      | 1.335 |            |       |
|                | XAF1        | 1.365 | BCL6      | 1.253           | ANXA2P2     | 1.335 |            |       |
|                | SILV        | 1.365 | CMPY3     | 1.253           | KLF6        | 1.331 |            |       |
|                | RSAD2       | 1.360 | AK2       | 1.252           | RFWD2       | 1.328 |            |       |
|                | CD38        | 1.353 | PXYD5     | 1.252           | ZNF738      | 1.327 |            |       |
|                | NKG7        | 1.353 | MDK       | 1.251           | MFHAS1      | 1.326 |            |       |
|                | NUPR1       | 1.351 | ARL85P1   | 1.251           | EIF1B       | 1.317 |            |       |
|                | OAS1_3      | 1.350 | RCAN1     | 1.250           | DNAJA1      | 1.314 |            |       |
|                | IFITM3      | 1.349 |           |                 | ID2         | 1.313 |            |       |
|                | CCL5_2      | 1.349 |           |                 | UBB         | 1.312 |            |       |
|                | MT1X        | 1.348 |           |                 | RNU6-1      | 1.310 |            |       |
|                | CCR2L2      | 1.344 |           |                 | MMP12       | 1.304 |            |       |
|                | ABHD5       | 1.344 |           |                 | DUXAP3      | 1.304 |            |       |
|                | C21ORF7     | 1.343 |           |                 | FTHL16      | 1.300 |            |       |
|                | PTGDS       | 1.342 |           |                 | MGC7895     | 1.292 |            |       |
|                | CAMP        | 1.340 |           |                 | TSPAN13     | 1.285 |            |       |
|                | P8          | 1.339 |           |                 | ATP5A1      | 1.284 |            |       |
|                | CCL23       | 1.335 |           |                 | COL22A1     | 1.282 |            |       |
|                | CD86        | 1.331 |           |                 | CLK1        | 1.281 |            |       |
|                | ANG_2       | 1.327 |           |                 | CCL24       | 1.281 |            |       |
|                | CES1_2      | 1.325 |           |                 | LSP1        | 1.280 |            |       |
|                | HLA-DRB5    | 1.325 |           |                 | SLC22B1     | 1.280 |            |       |
|                | SGLEC10     | 1.324 |           |                 | MGC10997    | 1.278 |            |       |
|                | OLR1        | 1.324 |           |                 | SLC25A24    | 1.278 |            |       |
|                | CCL8        | 1.318 |           |                 | PTTG1       | 1.277 |            |       |
|                | EST2        | 1.318 |           |                 | FAM5A       | 1.276 |            |       |
|                | RNASE4      | 1.317 |           |                 | HLA-F       | 1.272 |            |       |
|                | NCF4        | 1.311 |           |                 | EIF3A       | 1.268 |            |       |
|                | DEDD2       | 1.306 |           |                 | SDSL        | 1.267 |            |       |
|                | IFI27       | 1.302 |           |                 | PDLA3P      | 1.267 |            |       |
|                | LY6E        | 1.297 |           |                 | CRCP        | 1.267 |            |       |
|                | PIRRA       | 1.295 |           |                 | GSTP1       | 1.266 |            |       |
|                | FLJ10374    | 1.294 |           |                 | SLC38A2     | 1.265 |            |       |
|                | GPR162      | 1.294 |           |                 | RPS9        | 1.262 |            |       |
|                | PARP3       | 1.292 |           |                 | FTHL2       | 1.260 |            |       |
|                | OR1L4       | 1.290 |           |                 | JUNB        | 1.258 |            |       |
|                | ISG20       | 1.287 |           |                 | FKSG36      | 1.257 |            |       |
|                | ERN1        | 1.286 |           |                 | ABCG1       | 1.256 |            |       |
|                | FGL2        | 1.286 |           |                 | MCL1        | 1.256 |            |       |
|                | IL4I1       | 1.285 |           |                 | NME1-NME2   | 1.255 |            |       |
|                | BTG3        | 1.285 |           |                 | CREB1       | 1.254 |            |       |
|                | SLC16A8     | 1.282 |           |                 | AMY1C       | 1.252 |            |       |
|                | CAPZA2      | 1.281 |           |                 | PPA2        | 1.251 |            |       |
|                |             |       |           |                 | RSAD2       | 1.498 | CD58       | 2.087 |
|                |             |       |           |                 | IL6         | 1.452 | CD58_2     | 1.828 |
|                |             |       |           |                 | LY9         | 1.436 | VCAN       | 1.554 |
|                |             |       |           |                 | IFI27       | 1.421 | S100A8     | 1.489 |
|                |             |       |           |                 | HIST1H2BD   | 1.395 | BLZF1      | 1.385 |
|                |             |       |           |                 | SDC4        | 1.374 | IL1R2      | 1.380 |
|                |             |       |           |                 | CES1        | 1.368 | ABHD12     | 1.372 |
|                |             |       |           |                 | LY6E        | 1.366 | HSPA1A     | 1.351 |
|                |             |       |           |                 | PTGES       | 1.360 | RNU1G2     | 1.346 |
|                |             |       |           |                 | IFI6        | 1.347 | ARL2       | 1.345 |
|                |             |       |           |                 | HES4        | 1.347 | CD163_2    | 1.335 |
|                |             |       |           |                 | OGFRL1      | 1.346 | CXCL5_2    | 1.335 |
|                |             |       |           |                 | HIST1H2BD_2 | 1.339 | CXCL5      | 1.329 |
|                |             |       |           |                 | HIST3H2A    | 1.330 | TPM2       | 1.324 |
|                |             |       |           |                 | C1QC        | 1.322 | COL22A1    | 1.318 |
|                |             |       |           |                 | HIST2H2AA3  | 1.315 | CD1B       | 1.317 |
|                |             |       |           |                 | CYBASC3     | 1.315 | FTHL11     | 1.314 |
|                |             |       |           |                 | MUCL1       | 1.312 | CDKN2AIPNL | 1.313 |
|                |             |       |           |                 | SMG5        | 1.311 | CSORF28    | 1.311 |
|                |             |       |           |                 | OGFRL1_2    | 1.311 | C20ORF127  | 1.308 |
|                |             |       |           |                 | WNT1        | 1.310 | HCG2P7     | 1.306 |
|                |             |       |           |                 | SILV        | 1.302 | CD163      | 1.304 |
|                |             |       |           |                 | RARRES3     | 1.299 | RNU1-3     | 1.304 |
|                |             |       |           |                 | AKR1B1      | 1.286 | CREB1      | 1.302 |
|                |             |       |           |                 | GZMB        | 1.286 | RNU1A3     | 1.300 |
|                |             |       |           |                 | SDS         | 1.282 | SLC39A8    | 1.298 |
|                |             |       |           |                 | HLA-DRB5    | 1.279 | FCGR1B     | 1.296 |
|                |             |       |           |                 | STAT3       | 1.276 | BCAT1      | 1.294 |
|                |             |       |           |                 | RB1CC1      | 1.271 | STX4       | 1.293 |
|                |             |       |           |                 | ETS2        | 1.271 | CCL24      | 1.290 |
|                |             |       |           |                 | NEU1        | 1.271 | SDHC       | 1.286 |
|                |             |       |           |                 | HIST2H2AA4  | 1.269 | RTN1       | 1.285 |
|                |             |       |           |                 | TMEM158     | 1.268 | ANGPTL4    | 1.285 |
|                |             |       |           |                 | LSS         | 1.267 | ITGAM      | 1.284 |
|                |             |       |           |                 | SP140       | 1.265 | ZFP36L1    | 1.282 |
|                |             |       |           |                 | IL23A       | 1.262 | RNU1F1     | 1.277 |
|                |             |       |           |                 | HLA-DRB6    | 1.262 | CAT        | 1.276 |
|                |             |       |           |                 | TNFSF14     | 1.262 | NUMB_2     | 1.272 |
|                |             |       |           |                 | SF3B1       | 1.260 | HSPA7      | 1.269 |
|                |             |       |           |                 | PLEKH2      | 1.260 | TGM2       | 1.267 |
|                |             |       |           |                 | CAMP        | 1.260 | NDRG2      | 1.264 |
|                |             |       |           |                 | CCR7        | 1.259 | CMPK1      | 1.264 |
|                |             |       |           |                 | TNFAIP6     | 1.258 | COTL1      | 1.261 |
|                |             |       |           |                 | SERPING1    | 1.256 | SLC2A14    | 1.261 |
|                |             |       |           |                 | EPAS1       | 1.256 | ANXA2P1    | 1.259 |
|                |             |       |           |                 | CXCR4       | 1.256 | NUMB       | 1.259 |
|                |             |       |           |                 | DPVSL3      | 1.254 | STC1       | 1.252 |
|                |             |       |           |                 | PPID        | 1.252 | CAMK1      | 1.251 |
|                |             |       |           |                 | OAS1        | 1.252 |            |       |
|                |             |       |           |                 | CHKA        | 1.251 |            |       |
|                |             |       |           |                 | ADIPOR2     | 1.250 |            |       |

**Supplementary Fig. 3.** Transcriptomic analysis of macrophages transfected with control siRNA or CD58 siRNA and stimulated with live *C. albicans* for 6 hours or 24 hours.

Differentially expressed genes from control and CD58 siRNA cells were defined by at least 1.25-fold change at (A) 6 hours, and (B) 24 hours.

## Supplementary Fig. 4

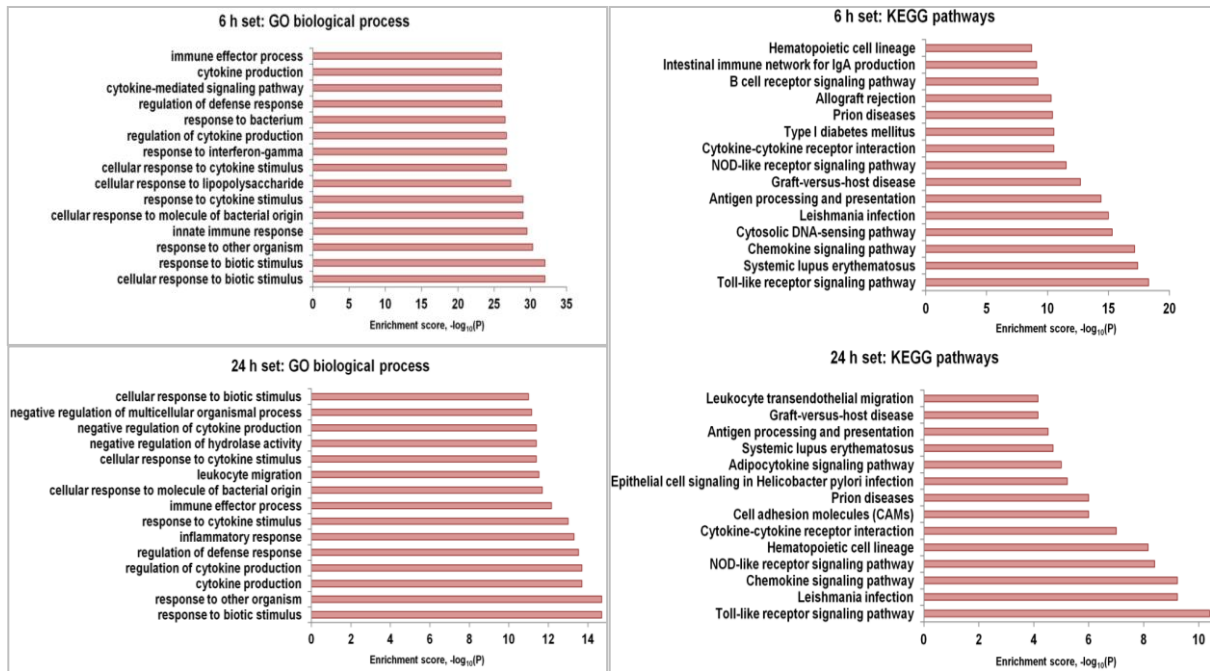

**Supplementary Fig. 4.** Transcriptomic analysis of macrophages transfected with control siRNA, CD58 siRNA, or TAGAP siRNA, and stimulated with live *C. albicans* for 6 hours or 24 hours. Differentially expressed genes between control and CD58 siRNA cells were defined by at least 1.25-fold change. GO enrichment and KEGG pathway enrichment analyses of the regulated genes by CD58 are shown respectively.

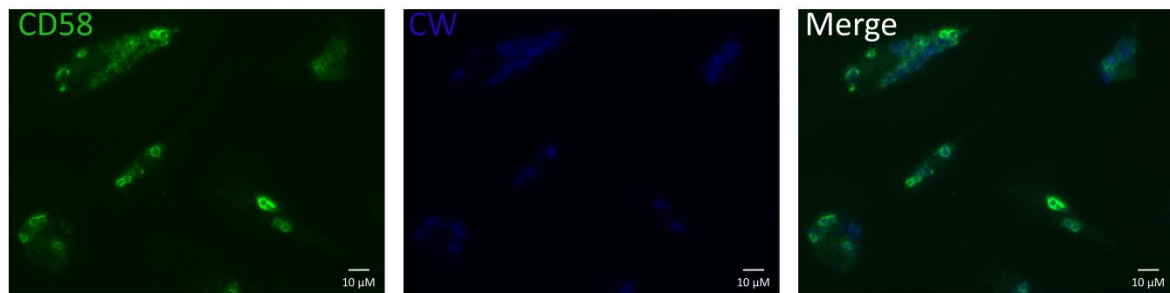

**Supplementary Fig. 5.** Immunofluorescence microscopic photos were taken after 1 hour incubation of live *Candida* with macrophages. CD58 (green) was co-localized with calcofluor white (blue, staining for the chitin of *Candida*).

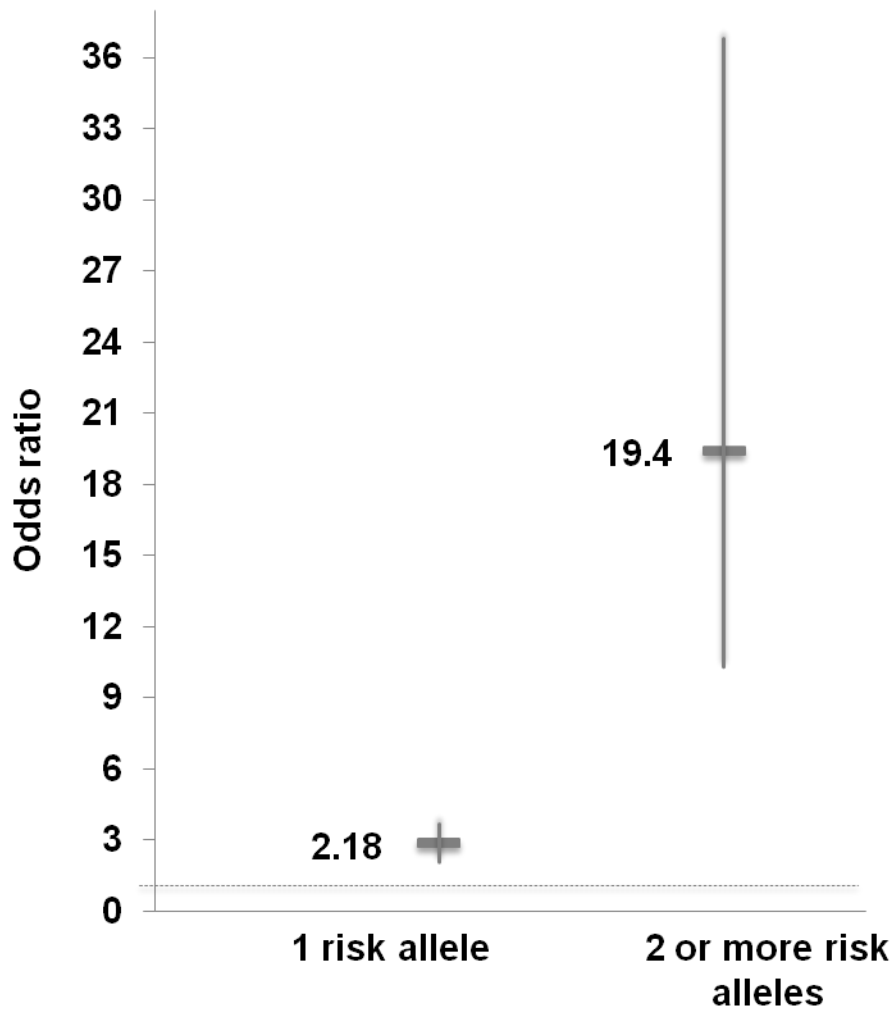

**Supplementary Fig. 6.** Odds ratio (OR) of cumulative effect of the three SNPs tested in the present study. The cumulative effects of three risk SNPs on candidemia risk among individuals carrying either 1 (OR = 2.18; CI = 1.50-3.16) or 2 and more risk alleles (OR = 19.40; CI = 10.24-36.75). The odds ratios were calculated relative to the individuals with no risk alleles for the three SNPs.

**Supplementary Fig. 7**

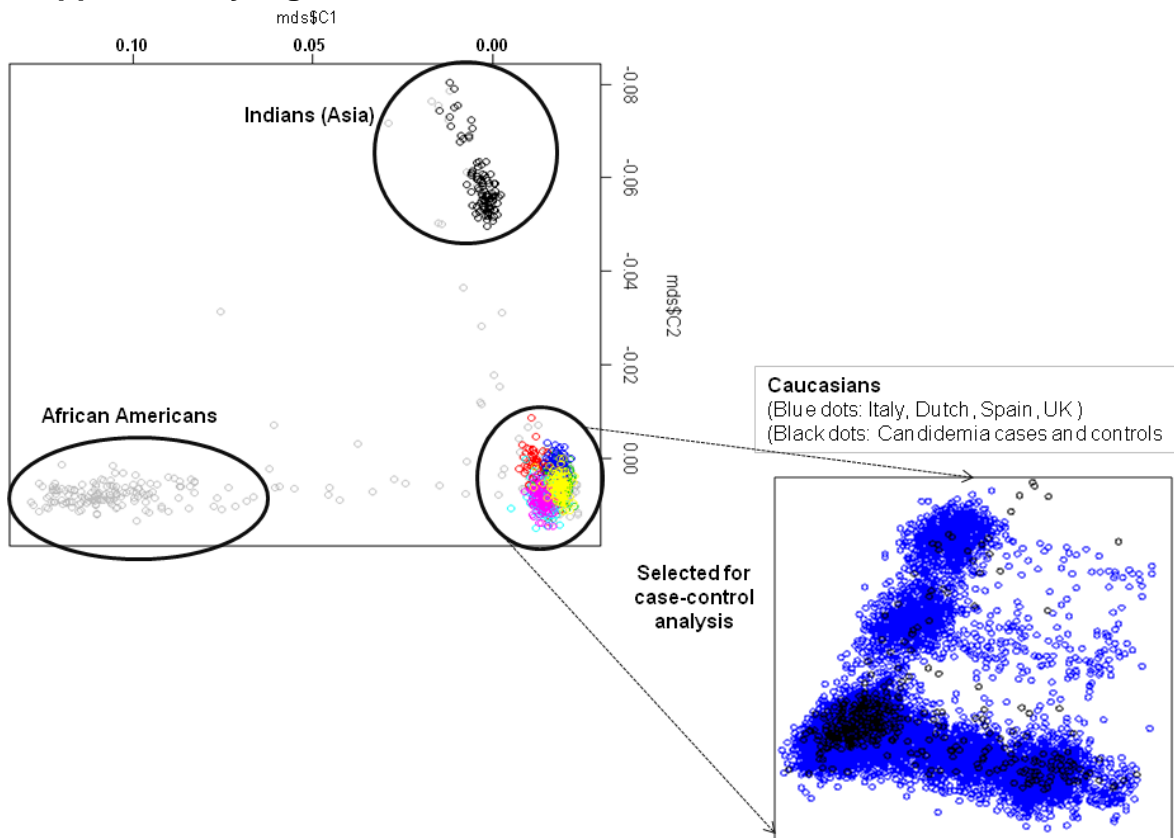

**Supplementary Fig. 7.** Multidimensional scaling (MDS) analysis (implemented in PLINK, MDS on the  $N \times N$  matrix of genome-wide IBS pairwise distances) was performed on individuals from Candidemia cohort by including population based control samples of known ethnicity as reference. Caucasian samples were well separated from African-American candidemia samples as well as Indian candidemia samples. Only samples which overlap with the known European ethnic populations were included (in the second panel) for case-control analysis.

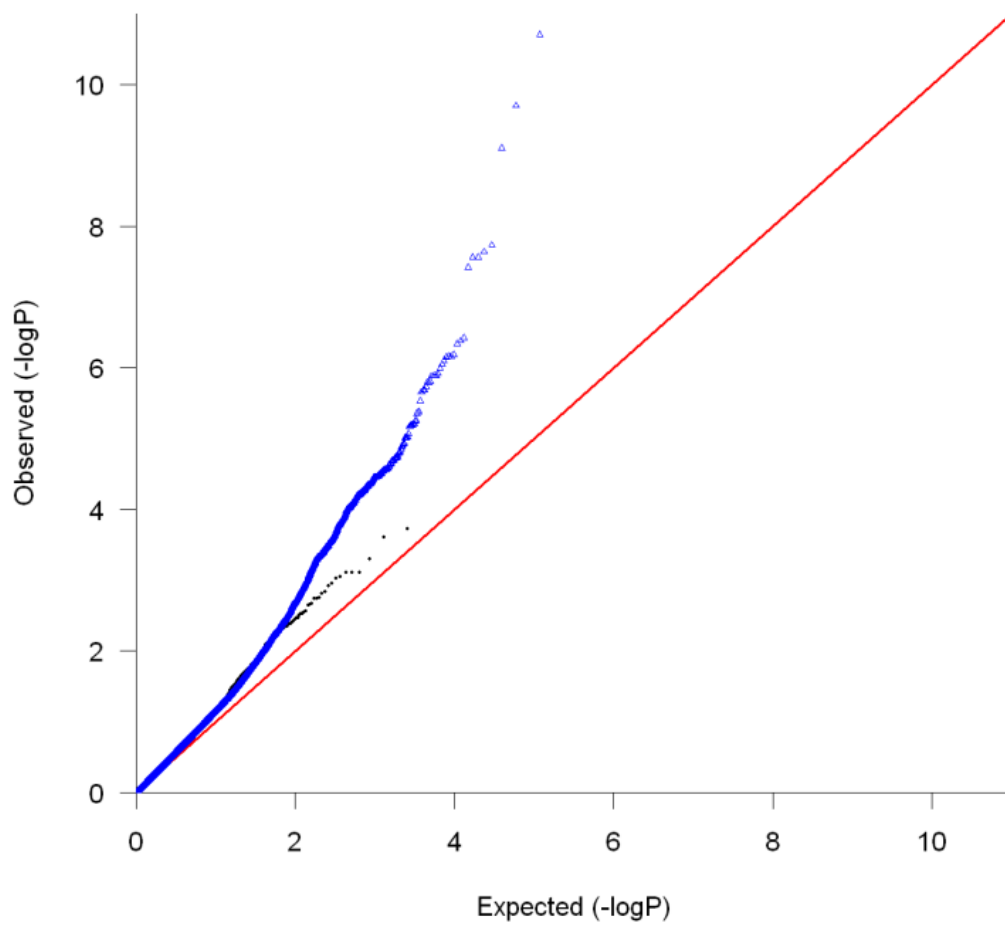

**Supplementary Fig. 8.** The Quantile-Quantile plot of association p values of all SNPs on the ImmunoChip array (blue points), and SNPs that are unrelated to immune-mediated traits (black points). The GWAS significant hits are circled using red dotted line. The genetic inflation factor  $\lambda$  for all SNPs was 1.22 and for non-immune SNPs was 1.102.



## Supplementary Tables

**Supplementary Table 1. Replication results at top 3 loci in African-American candidemia cohorts**

| rs ID      | Chr | Position (hg19) | Case |    |    |       | Controls |    |    |       | P     | Odds ratio (CI)   | Protein-coding gene |
|------------|-----|-----------------|------|----|----|-------|----------|----|----|-------|-------|-------------------|---------------------|
|            |     |                 | AA   | AB | BB | MAF   | AA       | AB | BB | MAF   |       |                   |                     |
| rs17035850 | 1   | 117032022       | 6    | 30 | 39 | 0.280 | 2        | 24 | 22 | 0.370 | 0.837 | 1.06 (0.60-1.87)  | CD58                |
| rs12025416 | 1   | 117038287       | 7    | 30 | 38 | 0.293 | 7        | 23 | 24 | 0.342 | 0.411 | 1.26 (0.74-2.13)  | CD58                |
| rs4845320  | 1   | 152709896       | 0    | 18 | 57 | 0.120 | 0        | 8  | 46 | 0.074 | 0.203 | 0.59 (0.25-1.4)   | LCE4A-C1orf68       |
| rs3127214  | 6   | 159511488       | 4    | 20 | 50 | 0.189 | 0        | 11 | 43 | 0.101 | 0.062 | 1.996 (0.95-4.18) | TAGAP               |

**Supplementary Table 2. Joint analysis at candidemia risk SNPs**

| rs ID      | Chr | Position (hg19) | Replication cohorts            | Case |    |     |        | Controls |    |     |       | p value | Odds ratio (CI)    | Gene  | p*    |
|------------|-----|-----------------|--------------------------------|------|----|-----|--------|----------|----|-----|-------|---------|--------------------|-------|-------|
|            |     |                 |                                | AA   | AB | BB  | MAF    | AA       | AB | BB  | MAF   |         |                    |       |       |
| rs17035850 | 1   | 117032022       | Validation cohort              | 3    | 16 | 198 | 0.051  | 0        | 8  | 138 | 0.027 | 0.15    | 1.58 (0.66-3.78)   | CD58  | 0.168 |
|            |     |                 | Switzerland candidiasis cohort | 0    | 1  | 26  | 0.019  | 0        | 4  | 36  | 0.050 | 0.336   | 0.36 (0.04-3.3)    |       |       |
|            |     |                 | Joint analysis                 | 3    | 17 | 224 | 0.0471 | 0        | 12 | 174 | 0.032 | 0.37    | 0.67 (0.32-1.39)   |       |       |
| rs12025416 | 1   | 117038287       | Validation cohort              | 11   | 57 | 147 | 0.184  | 1        | 32 | 111 | 0.118 | 0.022   | 1.694 (1.08-2.56)  | CD58  | 0.56  |
|            |     |                 | Switzerland candidiasis cohort | 2    | 8  | 17  | 0.222  | 0        | 13 | 27  | 0.163 | 0.376   | 1.47 (0.61-3.53)   |       |       |
|            |     |                 | Joint analysis                 | 13   | 65 | 164 | 0.188  | 1        | 45 | 138 | 0.128 | 0.016   | 1.64 (1.11-2.42)   |       |       |
| rs4845320  | 1   | 152709896       | Validation cohort              | 3    | 16 | 198 | 0.051  | 0        | 3  | 143 | 0.010 | 0.008   | 4.091 (1.21-13.85) | LCE   | NA    |
|            |     |                 | Switzerland candidiasis cohort | 0    | 1  | 27  | 0.018  | 0        | 0  | 40  | 0.000 | 0.229   | NA                 |       |       |
|            |     |                 | Joint analysis                 | 3    | 17 | 225 | 0.047  | 0        | 3  | 183 | 0.008 | 0.004   | 5.49 (1.64-18.35)  |       |       |
| rs3127214  | 6   | 159511488       | Validation cohort              | 3    | 23 | 191 | 0.067  | 0        | 8  | 137 | 0.027 | 0.026   | 2.51 (1.13-5.55)   | TAGAP | 0.112 |
|            |     |                 | Switzerland candidiasis cohort | 0    | 1  | 25  | 0.019  | 0        | 4  | 36  | 0.050 | 0.356   | 0.37 (0.004-3.43)  |       |       |
|            |     |                 | Joint analysis                 | 3    | 24 | 216 | 0.061  | 0        | 12 | 173 | 0.032 | 0.842   | 0.51 (0.25-1.03)   |       |       |

Chr; Chromosome

\*P value for heterogeneity calculated using Breslow-Day test

**Supplementary Table 3(A) Functional annotation of CD58 SNP and its proxies with  $r^2 \geq 0.8$  using HaploReg**

| Functional annotation of CD58 SNP, rs17035850 and variants with $r^2 \geq 0.8$ |            |           |      |             |     |     |                                     |               |               |                |                   |                   |
|--------------------------------------------------------------------------------|------------|-----------|------|-------------|-----|-----|-------------------------------------|---------------|---------------|----------------|-------------------|-------------------|
| chr                                                                            | pos (hg19) | LD        | LD   | variant     | Ref | Alt | Minor allele frequency in EUROPEANS | Promoter      | Enhancer      | DNase          | Proteins          | Motifs            |
|                                                                                |            | ( $r^2$ ) | (D') |             |     |     | MAF                                 | histone marks | histone marks |                | bound             | changed           |
| 1                                                                              | 117031305  | 0.84      | 0.92 | rs58830348  | C   | T   | 0.02                                |               | 5 cell types  |                |                   | 10 altered motifs |
| 1                                                                              | 117032022  | 1         | 1    | rs17035850  | A   | T   | 0.02                                |               | 7 cell types  | 13 cell types  | 10 bound proteins | NRSF              |
| 1                                                                              | 117032630  | 1         | 1    | rs17035853  | C   | T   | 0.02                                |               | 6 cell types  | HMVEC-LB1,NH-A |                   |                   |
| 1                                                                              | 117034860  | 1         | 1    | rs74111604  | G   | C   | 0.02                                |               | K562, HepG2   | 5 cell types   |                   | NRSF,TCF12        |
| 1                                                                              | 117036111  | 1         | 1    | rs148224339 | C   | T   | 0.02                                |               | HepG2, K562   | CLL            |                   | ZEB1              |
| 1                                                                              | 117043713  | 0.92      | 1    | rs76594009  | G   | T   | 0.02                                |               | K562          |                |                   | Hoxa5,TCF12       |
| 1                                                                              | 117048486  | 0.84      | 0.92 | rs61789220  | G   | A   | 0.02                                |               | 4 cell types  |                |                   | Foxa,GR,STAT      |
| 1                                                                              | 117087590  | 0.84      | 0.92 | rs61789231  | G   | A   | 0.02                                |               | 4 cell types  | 6 cell types   | 16 bound proteins | 4 altered motifs  |

**Supplementary Table 3(B) Functional annotation of LCE locus SNP and its proxies with  $r^2 \geq 0.8$  using HaploReg**

| Functional annotation of LCE locus SNP, rs4845320 and variants with $r^2 \geq 0.8$ |            |           |      |             |     |     |                                     |               |            |        |                     |  |
|------------------------------------------------------------------------------------|------------|-----------|------|-------------|-----|-----|-------------------------------------|---------------|------------|--------|---------------------|--|
| chr                                                                                | pos (hg19) | LD        | LD   | variant     | Ref | Alt | Minor allele frequency in EUROPEANS | Enhancer      | DNase      | Motifs | changed             |  |
|                                                                                    |            | ( $r^2$ ) | (D') |             |     |     | MAF                                 | histone marks |            |        |                     |  |
| 1                                                                                  | 152625292  | 0.91      | 1    | rs12048544  | C   | A   | 0.01                                |               |            |        | 4 altered motifs    |  |
| 1                                                                                  | 152647240  | 0.91      | 1    | rs12024423  | G   | C   | 0.01                                |               |            |        | GATA                |  |
| 1                                                                                  | 152666149  | 0.91      | 1    | rs140940191 | C   | A   | 0.01                                |               |            |        | 7 altered motifs    |  |
| 1                                                                                  | 152680720  | 0.91      | 1    | rs12033945  | A   | G   | 0.01                                |               |            |        | 4 altered motifs    |  |
| 1                                                                                  | 152681835  | 0.82      | 0.91 | rs10888510  | G   | T   | 0.01                                |               |            |        | CTCF,HDAC2,Myc      |  |
| 1                                                                                  | 152682533  | 0.82      | 0.91 | rs74130116  | T   | C   | 0.01                                |               |            |        | 4 altered motifs    |  |
| 1                                                                                  | 152682708  | 0.82      | 0.91 | rs12036739  | T   | C   | 0.01                                |               |            |        | MeF2,Msx-1,Nanog    |  |
| 1                                                                                  | 152687791  | 1         | 1    | rs61281084  | T   | C   | 0.01                                |               |            |        | Nrf-2               |  |
| 1                                                                                  | 152688119  | 1         | 1    | rs80154606  | T   | C   | 0.01                                |               |            |        | ERalpha,a,RORalpha1 |  |
| 1                                                                                  | 152689730  | 1         | 1    | rs12040771  | G   | C   | 0.01                                |               |            |        | AP-2rep,Egr-1,Gcm1  |  |
| 1                                                                                  | 152690547  | 1         | 1    | rs16834366  | A   | G   | 0.01                                |               | HMEC, NHEK |        | 4 altered motifs    |  |
| 1                                                                                  | 152693043  | 1         | 1    | rs16834376  | C   | T   | 0.01                                |               |            |        |                     |  |
| 1                                                                                  | 152693600  | 1         | 1    | rs75063514  | T   | G   | 0.01                                |               |            |        |                     |  |
| 1                                                                                  | 152694501  | 1         | 1    | rs6656896   | T   | G   | 0.01                                |               |            | T-47D  | EWSR1-FLI1          |  |
| 1                                                                                  | 152696256  | 1         | 1    | rs4845472   | G   | C   | 0.01                                |               |            |        | 5 altered motifs    |  |
| 1                                                                                  | 152698168  | 1         | 1    | rs12048867  | G   | A   | 0.01                                |               |            |        |                     |  |
| 1                                                                                  | 152698935  | 1         | 1    | rs6661464   | G   | T   | 0.01                                |               |            | LNcaP  | HNF4                |  |
| 1                                                                                  | 152702580  | 1         | 1    | rs12045233  | T   | C   | 0.01                                |               |            |        | Foxp1,RREB-1        |  |
| 1                                                                                  | 152707760  | 1         | 1    | rs78389247  | G   | T   | 0.01                                |               |            |        | GR,PU.1             |  |
| 1                                                                                  | 152709896  | 1         | 1    | rs4845320   | A   | C   | 0.01                                |               |            |        | Bbx,Hbp1,Pax-4      |  |

**Supplementary Table 3(C) Functional annotation of TAGAP SNP and its proxies with  $r^2 \geq 0.8$  using HaploReg**

| Functional annotation of TAGAP SNP, rs3127214 and variants with $r^2 \geq 0.8$ |            |                      |         |           |     |     |                                     |               |               |                    |                 |  |
|--------------------------------------------------------------------------------|------------|----------------------|---------|-----------|-----|-----|-------------------------------------|---------------|---------------|--------------------|-----------------|--|
| chr                                                                            | pos (hg19) | LD (r <sup>2</sup> ) | LD (D') | variant   | Ref | Alt | Minor allele frequency in EUROPEANS | Enhancer      | DNase         | Proteins           | Motifs          |  |
|                                                                                |            |                      |         |           |     |     | MAF                                 | histone marks |               | bound              | changed         |  |
| 6                                                                              | 159498306  | 0.96                 | 1       | rs1572527 | G   | A   | 0.03                                | GM12878       | 10 cell types | BATF,BC L11A,EG R1 | AP-1,Bach2,HNF1 |  |
| 6                                                                              | 159501256  | 1                    | 1       | rs103418  | G   | A   | 0.03                                | HSM1, GM12878 | CLL,Jurkat    | EBF1               | Arnt,GATA,My    |  |
| 6                                                                              | 159504878  | 1                    | 1       | rs127210  | A   | G   | 0.03                                |               |               |                    |                 |  |
| 6                                                                              | 159507027  | 1                    | 1       | rs3127211 | C   | A   | 0.03                                | NHEK, K562    |               |                    | AhR::Arnt,Arnt  |  |
| 6                                                                              | 159507971  | 1                    | 1       | rs3127212 | A   | G   | 0.03                                | K562          |               |                    | Foxp1           |  |
| 6                                                                              | 159511488  | 1                    | 1       | rs3127214 | C   | T   | 0.03                                |               |               |                    |                 |  |

**Supplementary Table 4. Co-regulation partners of RP5-1086K13.1 extracted using GeneNetwork database**

| Queried gene  | coregulated genes    | coregulated gene Ensembl ID | Chromosome | start     | stop      | strand | z score | P value  |
|---------------|----------------------|-----------------------------|------------|-----------|-----------|--------|---------|----------|
| RP5-1086K13.1 | <i>CD58</i>          | ENSG00000116815             | 1          | 117057157 | 117113661 | -      | 11.28   | 1.65E-29 |
| RP5-1086K13.1 | <i>SH2D4B</i>        | ENSG00000178217             | 10         | 82297658  | 82406316  | +      | 5.87    | 4.36E-09 |
| RP5-1086K13.1 | <i>CTC-436K13.5</i>  | ENSG00000253792             | 5          | 157600609 | 157603430 | -      | 5.78    | 7.47E-09 |
| RP5-1086K13.1 | <i>TMEM106A</i>      | ENSG00000184988             | 17         | 41363894  | 41371589  | +      | 4.86    | 1.17E-06 |
| RP5-1086K13.1 | <i>RP3-523C21.1</i>  | ENSG00000228495             | 6          | 132453055 | 132490514 | +      | 4.61    | 4.03E-06 |
| RP5-1086K13.1 | <i>ZNF674</i>        | ENSG00000251192             | 23         | 46357162  | 46404892  | -      | 4.56    | 5.12E-06 |
| RP5-1086K13.1 | <i>HCG27</i>         | ENSG00000206344             | 6          | 31165537  | 31171745  | +      | 4.44    | 9.00E-06 |
| RP5-1086K13.1 | <i>ANKHD1</i>        | ENSG00000131503             | 5          | 139781399 | 139929163 | +      | 4.39    | 1.13E-05 |
| RP5-1086K13.1 | <i>HMHB1</i>         | ENSG00000158497             | 5          | 143191726 | 143200284 | +      | 4.36    | 1.30E-05 |
| RP5-1086K13.1 | <i>AC135050.2</i>    | ENSG00000249093             | 16         | 31052374  | 31054276  | +      | 4.31    | 1.63E-05 |
| RP5-1086K13.1 | <i>AL096869.5</i>    | ENSG00000233208             | 14         | 90921574  | 90925249  | +      | 4.28    | 1.87E-05 |
| RP5-1086K13.1 | <i>RAG2</i>          | ENSG00000175097             | 11         | 36597124  | 36619829  | -      | 4.27    | 1.95E-05 |
| RP5-1086K13.1 | <i>RP11-290F20.1</i> | ENSG00000203999             | 20         | 48909257  | 48931459  | +      | 4.24    | 2.24E-05 |
| RP5-1086K13.1 | <i>SIN3B</i>         | ENSG00000127511             | 19         | 16940218  | 16991164  | +      | -4.16   | 3.18E-05 |
| RP5-1086K13.1 | <i>RP11-397G17.1</i> | ENSG00000226733             | 6          | 50061424  | 50066995  | +      | 4.11    | 3.96E-05 |
| RP5-1086K13.1 | <i>TRAF1</i>         | ENSG00000056558             | 9          | 123664671 | 123691451 | -      | 4.11    | 3.96E-05 |
| RP5-1086K13.1 | <i>OR2B6</i>         | ENSG00000124657             | 6          | 27925019  | 27925960  | +      | 4.11    | 3.96E-05 |
| RP5-1086K13.1 | <i>RADIL</i>         | ENSG00000157927             | 7          | 4836686   | 4923350   | -      | 4.05    | 5.12E-05 |
| RP5-1086K13.1 | <i>CHRNA10</i>       | ENSG00000129749             | 11         | 3686817   | 3692614   | -      | 3.99    | 6.61E-05 |
| RP5-1086K13.1 | <i>GHRL0S</i>        | ENSG00000240288             | 3          | 10327472  | 10334334  | +      | 3.98    | 6.89E-05 |
| RP5-1086K13.1 | <i>AP000295.7</i>    | ENSG00000223799             | 21         | 34636178  | 34638565  | -      | 3.93    | 8.49E-05 |

**Supplementary Table 5. Association of candidemia SNPs with severity of fungal disease**

| SNP rs number             | Persistent fungemia (P-value) | Disseminated disease (P-value) |
|---------------------------|-------------------------------|--------------------------------|
| rs17035850 (CD58)         | 0.005                         | NS                             |
| rs12025416 (CD58)         | NS                            | NS                             |
| rs3127214 (TAGAP)         | NS                            | 0.017                          |
| rs4845320 (LCE4A-C1orf68) | NS                            | NS                             |
| NS; not significant       |                               |                                |

**Supplementary Table 6. The names of the institutional review boards that approved the study**

| Name of Review Board                                                                         | Study Population               |
|----------------------------------------------------------------------------------------------|--------------------------------|
| Review board of the department of Medicine of the Radboud University Nijmegen Medical Centre | Candidemia cohort              |
| Review board of Duke University Hospital                                                     | Candidemia cohort              |
| Review board of Duke University Hospital                                                     | Candidemia control cohort      |
| Review board of the department of Medicine of the Radboud University Nijmegen Medical Centre | In vitro macrophage experiment |
